# Supplementary material for: A family of interaction-adjusted indices of community similarity
Source: PubMed Central journal article supplement (PMC5322292; doi:10.1038/ismej.2016.139), 2016-12-09

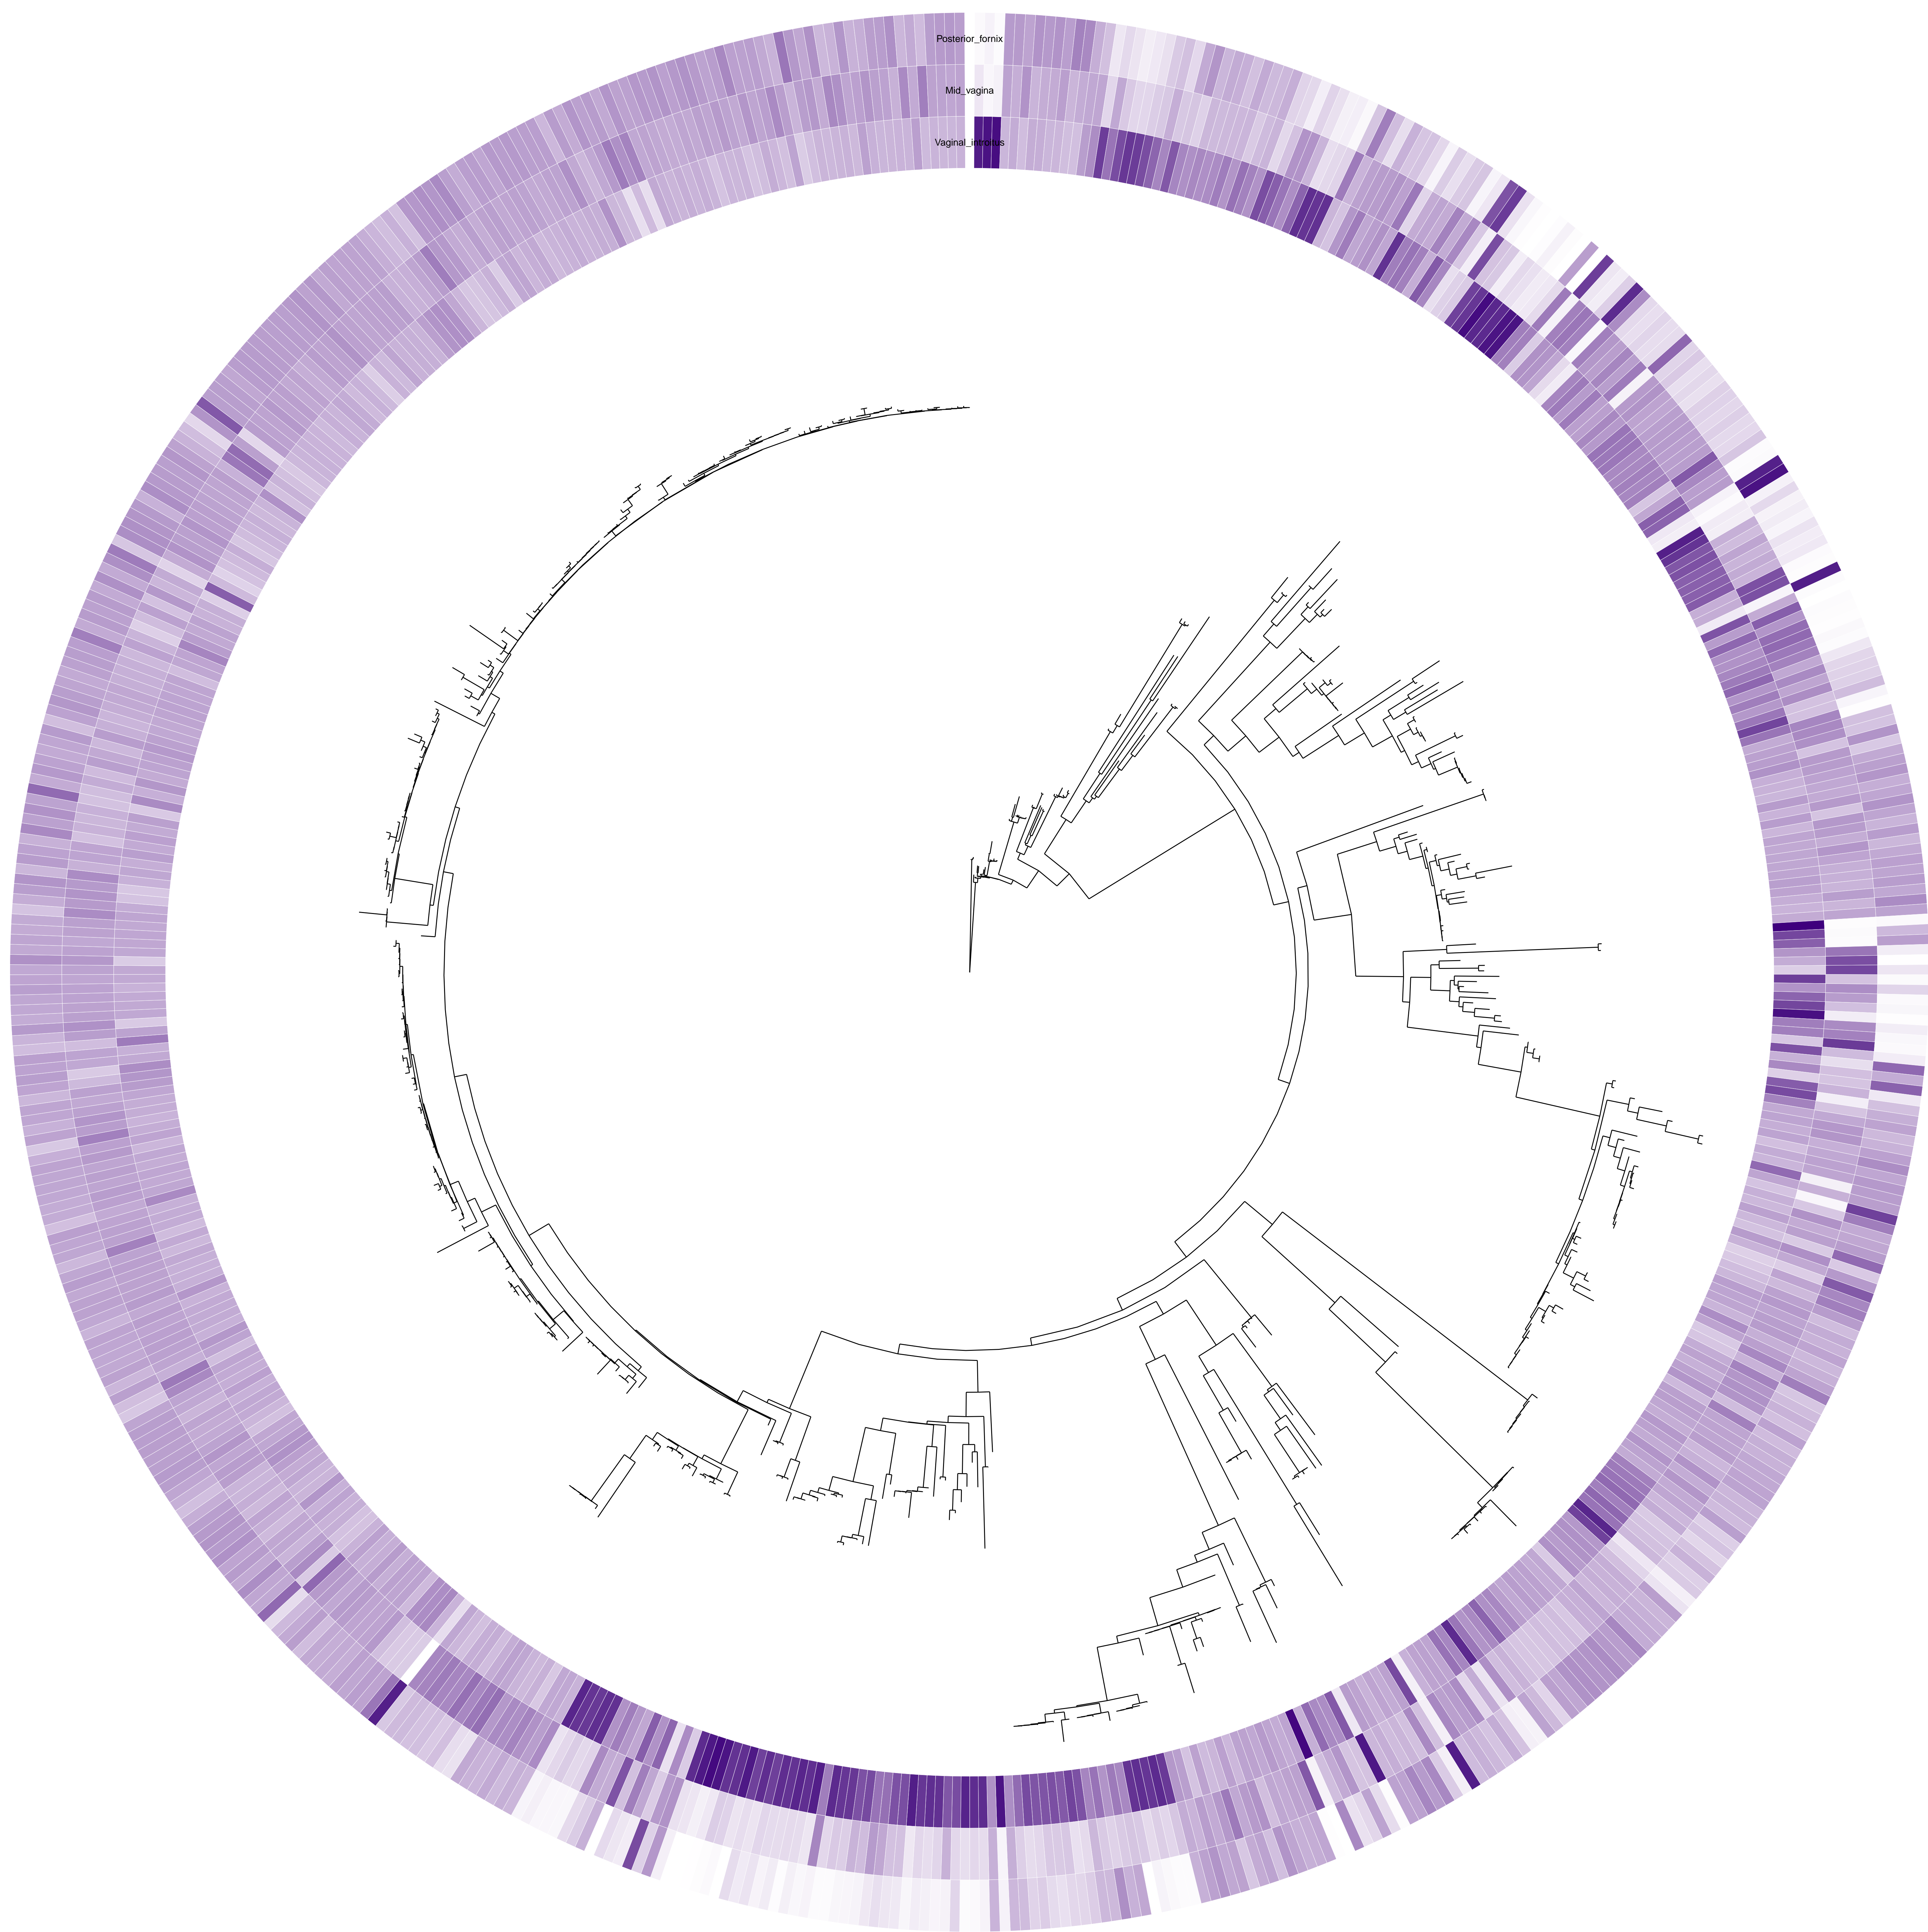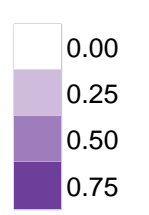

Supplement: ismej2016139x5.pdf [file ismej2016139x5.pdf]
