# Supplementary material for: A family of interaction-adjusted indices of community similarity
Source: PubMed Central journal article supplement (PMC5322292; doi:10.1038/ismej.2016.139), 2016-12-09
Supplement: ismej2016139x6.pdf [file ismej2016139x6.pdf]

vaginal introitus

mid vagina

posterior fornix

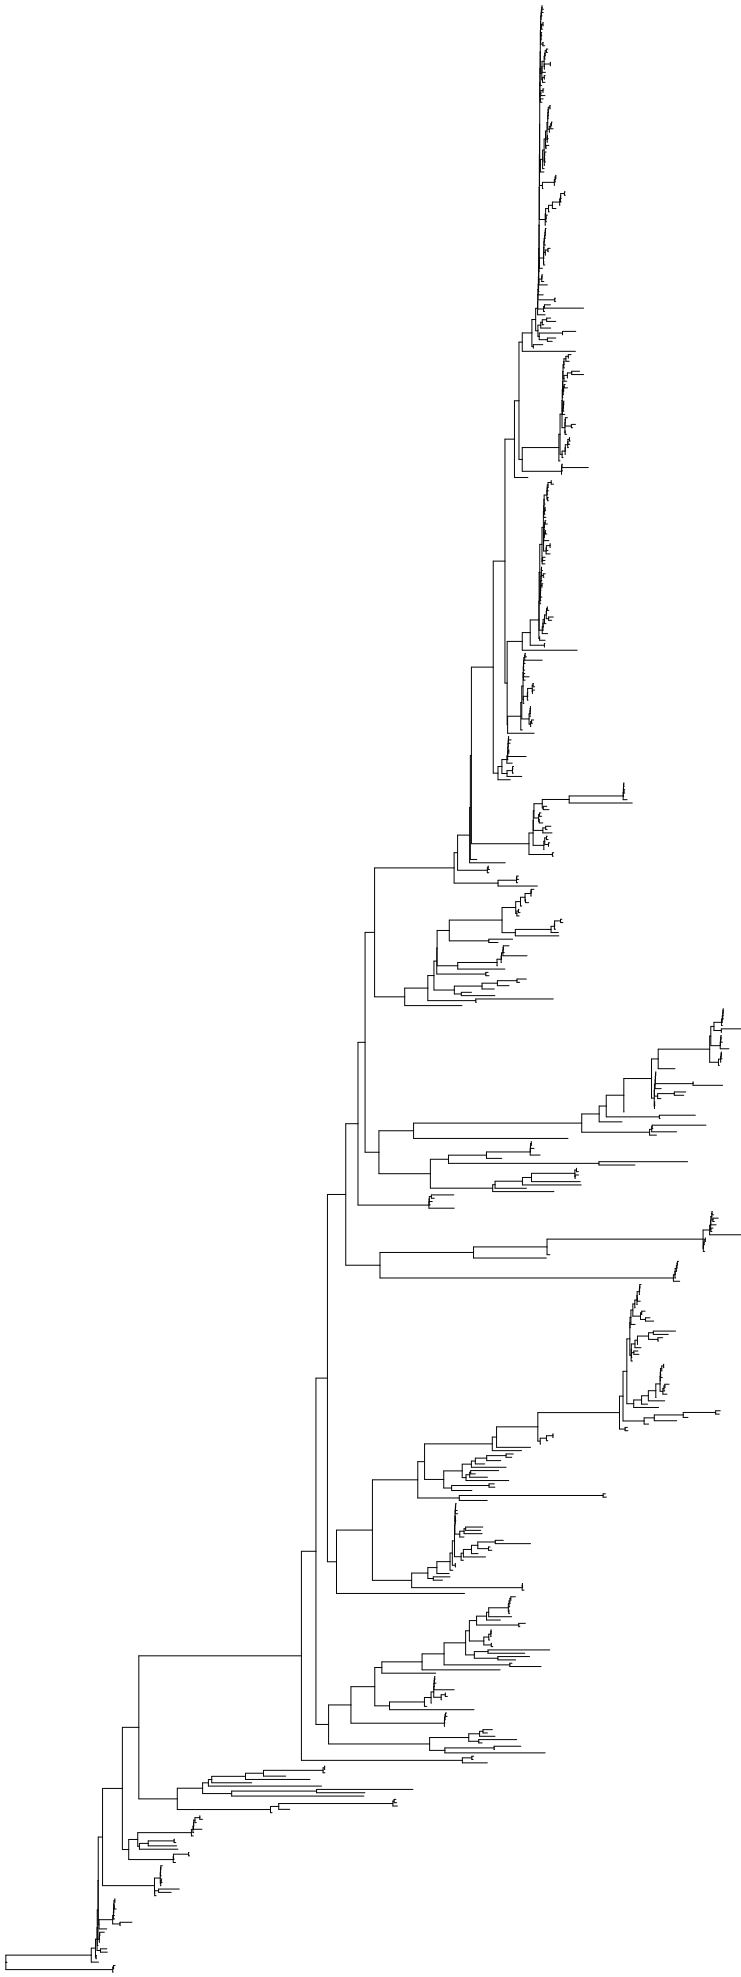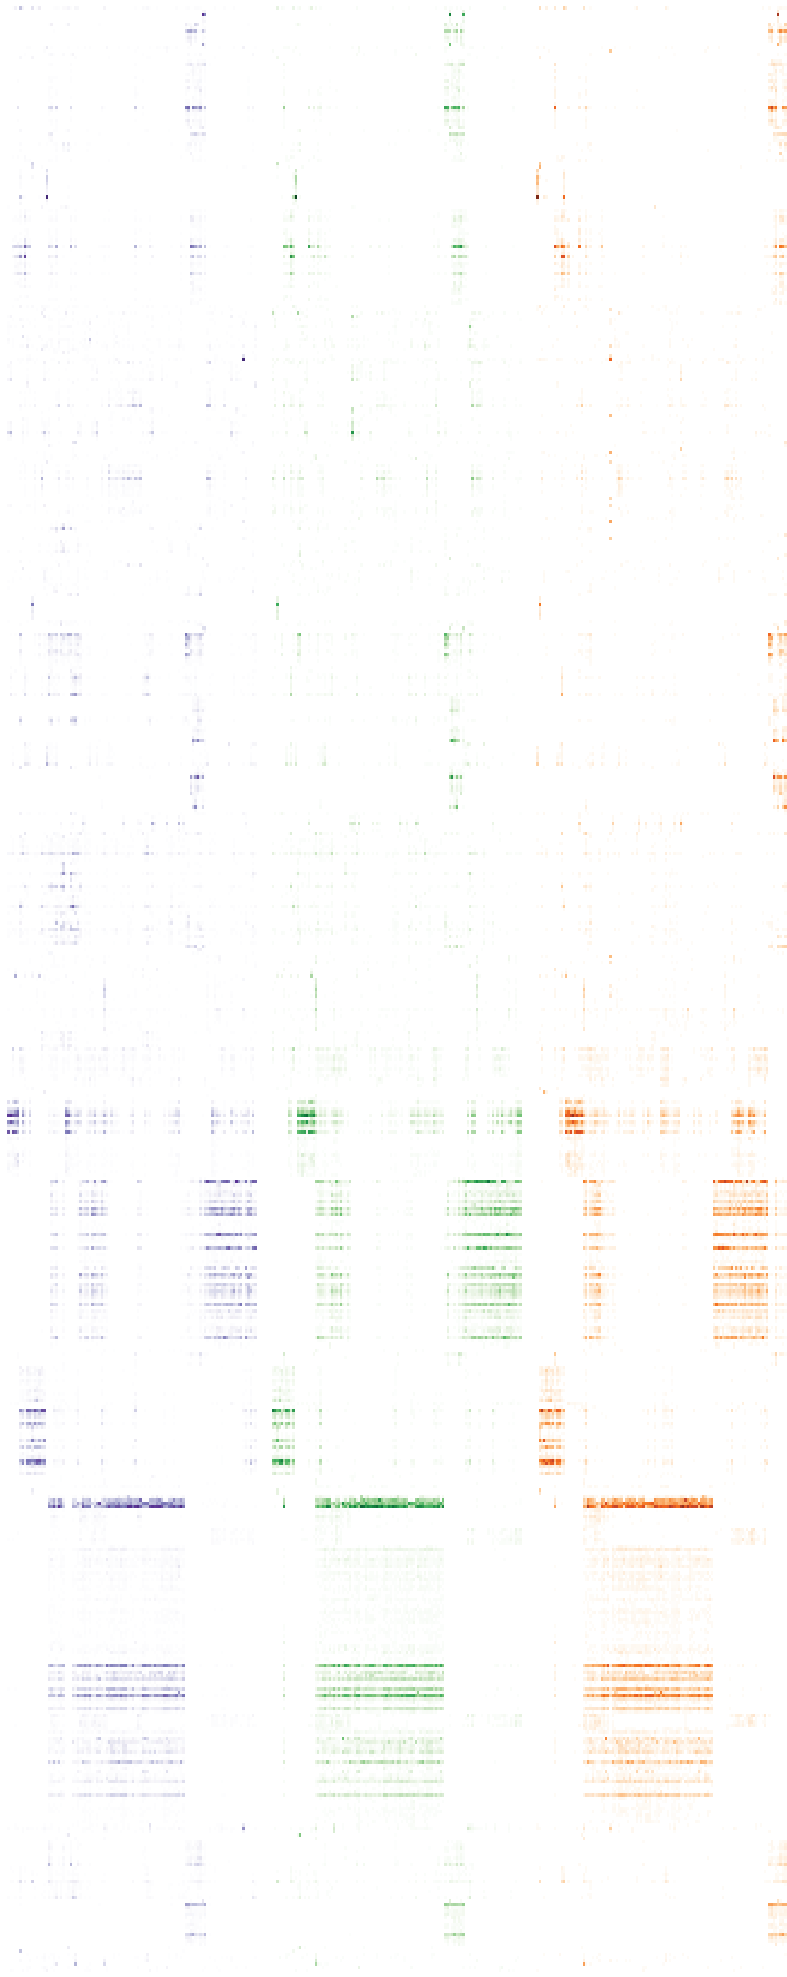

(relative OTU abundance)<sup>1/3</sup>
