# Supplementary material for: A family of interaction-adjusted indices of community similarity
Source: PubMed Central journal article supplement (PMC5322292; doi:10.1038/ismej.2016.139), 2016-12-09
Supplement: ismej2016139x7.pdf [file ismej2016139x7.pdf]

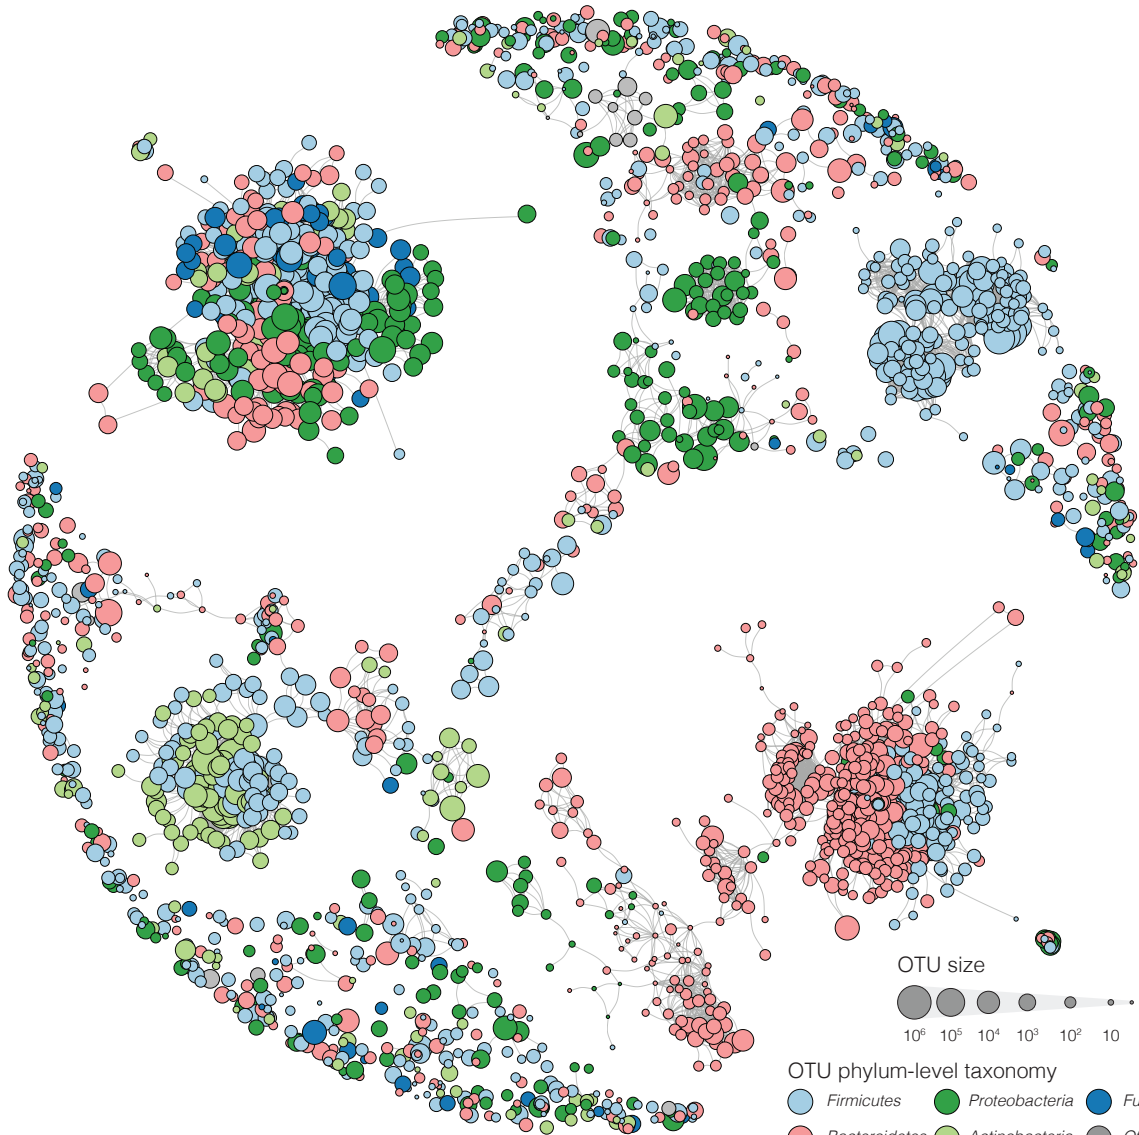

OTU phylum-level taxonomy

- Firmicutes
- Proteobacteria
- Fusobacteria
- Bacteroidetes
- Actinobacteria
- Other
